# Supplementary material for: Reconstruction and analysis of genome-scale metabolic model of a photosynthetic bacterium
Source: Springer Nature journal article supplement (doi:10.1186/1752-0509-4-156), 2010-11-17

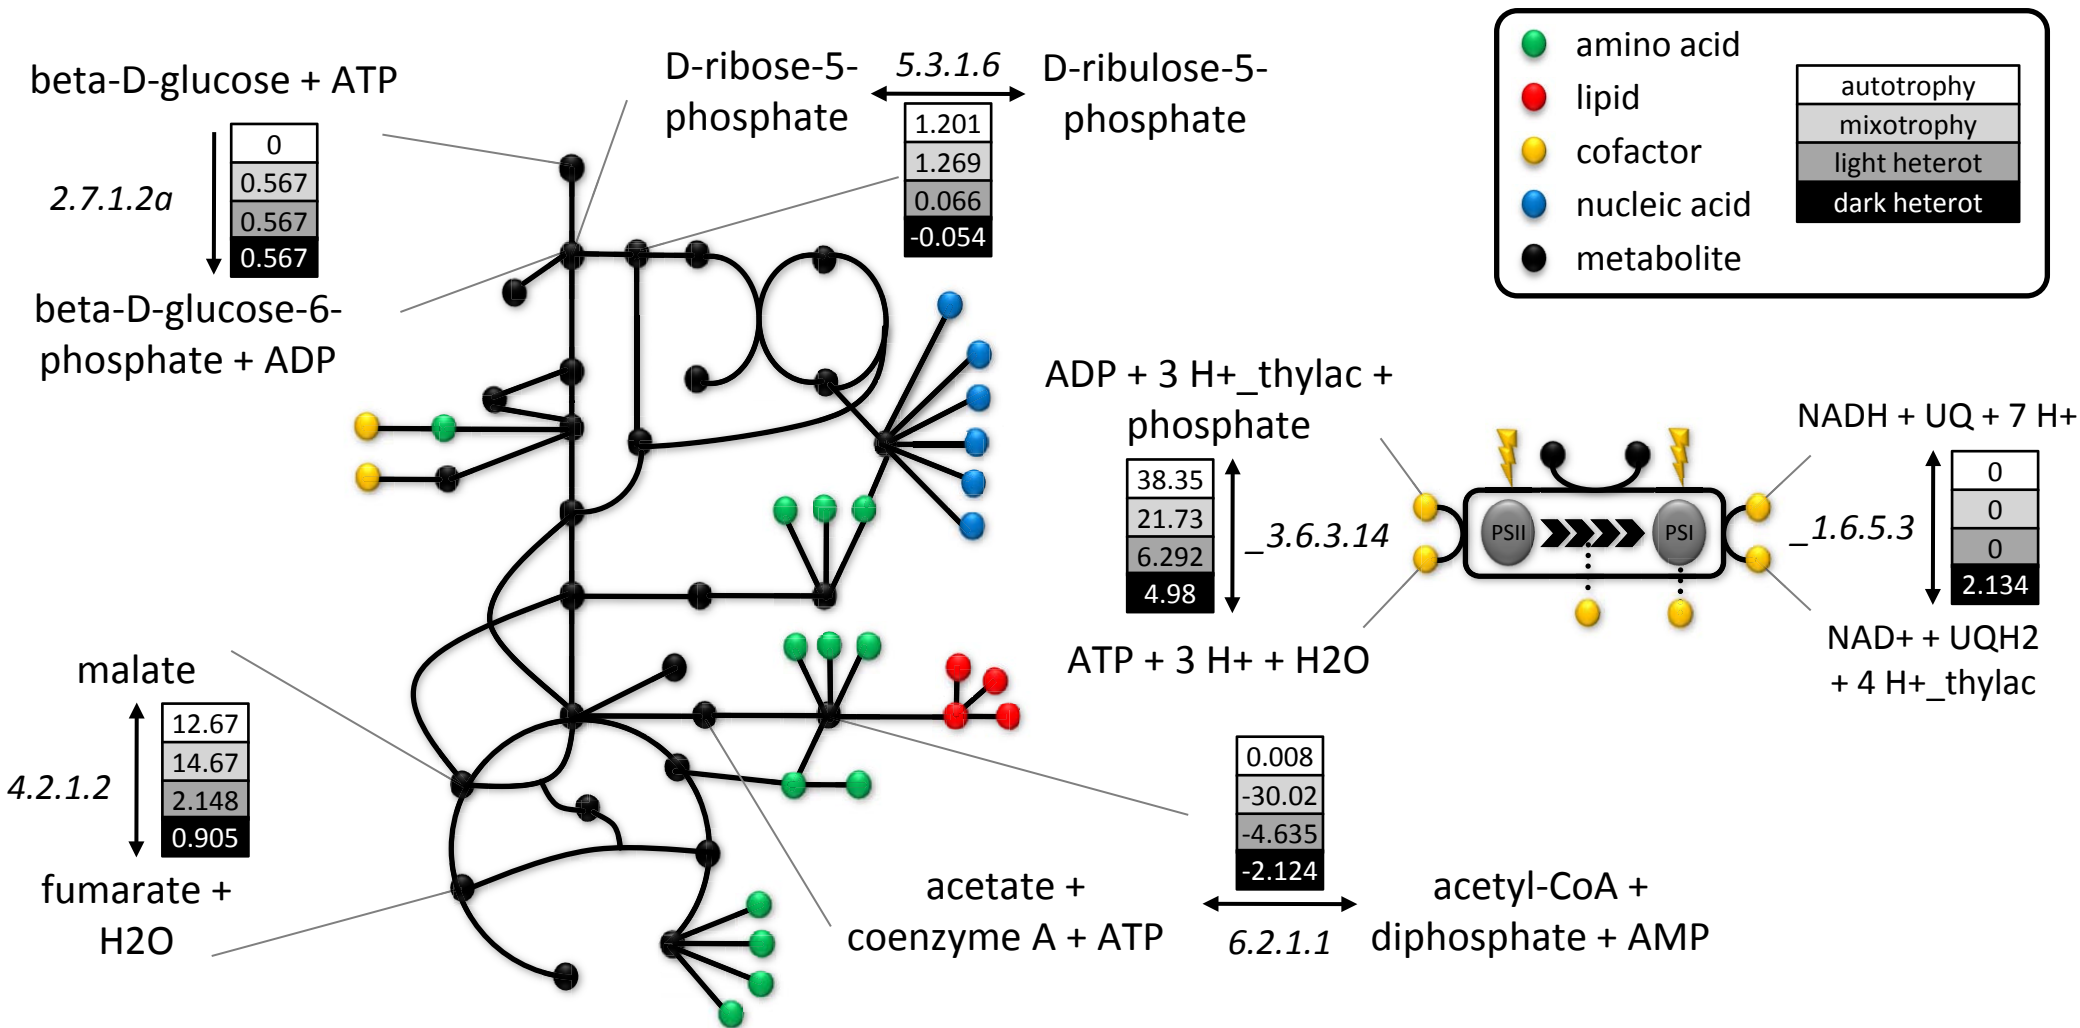

Supplement: 12918_2010_567_MOESM8_ESM.pdf [file 12918_2010_567_MOESM8_ESM.pdf]
