# Supplementary material for: Reconstruction and analysis of genome-scale metabolic model of a photosynthetic bacterium
Source: Springer Nature journal article supplement (doi:10.1186/1752-0509-4-156), 2010-11-17
Supplement: 12918_2010_567_MOESM10_ESM.pdf [file 12918_2010_567_MOESM10_ESM.pdf]

*E. coli*

*S. cerevisiae*

*Synechocystis*

MOMA

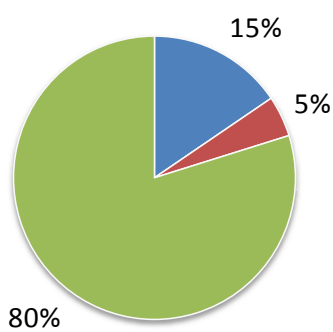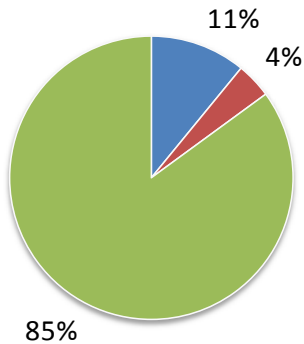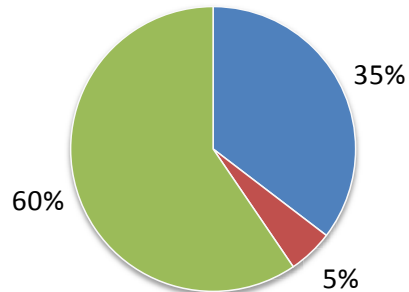

FBA

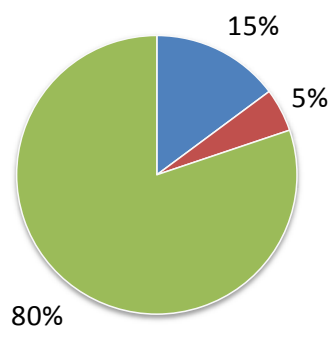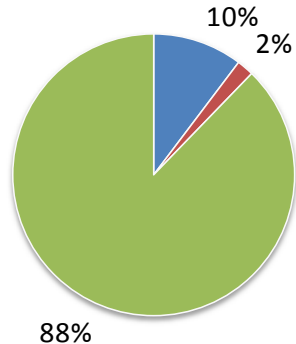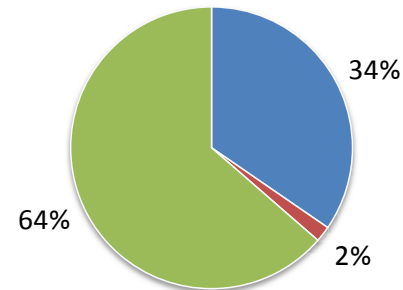

no growth

constrained growth

wild type growth
